# Supplementary material for: The spike receptor-binding motif G496S substitution determines the replication fitness of SARS-CoV-2 Omicron sublineage
Source: PubMed Central journal article supplement (PMC9448440; doi:10.1080/22221751.2022.2111977), 2022-08-31
Supplement: TEMI_A_2111977_SM5760.pdf [file TEMI_A_2111977_SM5760.pdf]

1

2

3

## Supplementary Materials for

4

**The spike receptor-binding motif G496S substitution determines the replication**

5

**fitness of SARS-CoV-2 Omicron sublineage**

6

7

8

9

**The file includes:**

10

Supplementary Table 1

11

Supplementary Figures 1 to 3

12

13

14 **Supplementary Material**15 **Supplementary Table 1**

| Primer                   | Sequence 5' – 3'                                                                                                                                    |
|--------------------------|-----------------------------------------------------------------------------------------------------------------------------------------------------|
| galK-F'                  | GCACACCTTGTAATGGTGTGAAGGTTTTAATTGTTAC<br>TTTCCTTTACAACCTGTTGACAATTAATCATCGGCA                                                                       |
| galK-R'                  | GTAGAAGTTCAAAGAAAGTACTACTACTCTGTATGG<br>TTGGTAACCAACATCAGCACTGTCCTGCTCCTT                                                                           |
| S496-F'                  | GCACACCTTGTAATGGTGTGAAGGTTTTAATTGTTAC<br>TTTCCTTTACAATCATAT <u>AGTTTCCA</u> ACCCACTAATGG<br>TGTTGGTTACCAACCATAACAGAGTAGTAGTACTTTCTT<br>TTGAACTTCTAC |
| S496-R'                  | GTAGAAGTTCAAAGAAAGTACTACTACTCTGTATGG<br>TTGGTAACCAACACCATTAGTGGGTTGGAA <u>ACT</u> ATAT<br>GATTGTAAAGGAAAGTAACAATTAACCTTCAACAC<br>CATTACAAGGTGTGC    |
| G496 <sub>R498</sub> -F' | GCACACCTTGTAATGGTGTGAAGGTTTTAATTGTTAC<br>TTTCCTTTACAATCATATGGTTT <u>CCG</u> ACCCACTAATGG<br>TGTTGGTTACCAACCATAACAGAGTAGTAGTACTTTCTT<br>TTGAACTTCTAC |
| G496 <sub>R498</sub> -R' | GTAGAAGTTCAAAGAAAGTACTACTACTCTGTATGG<br>TTGGTAACCAACACCATTAGTGGG <u>TCCG</u> GAAACCATAT<br>GATTGTAAAGGAAAGTAACAATTAACCTTCAACAC<br>CATTACAAGGTGTGC   |
| S496 <sub>R498</sub> -F' | GCACACCTTGTAATGGTGTGAAGGTTTTAATTGTTAC<br>TTTCCTTTACAATCATAT <u>AGTTTCCG</u> ACCCACTAATGG<br>TGTTGGTTACCAACCATAACAGAGTAGTAGTACTTTCTT<br>TTGAACTTCTAC |
| S496 <sub>R498</sub> -R' | CCCACTAATGGTGTGGTTACCAACCATAACAGAGTAG<br>TAGTACTTTCTTTTGA <u>ACTTCTACTCGGAACT</u><br>ATATGATTGTAAAGGAAAGTAACAATTAACCTTCA<br>ACACCATTACAAGGTGTGC     |

16 \* Targeted amino acid sequences are underlined.

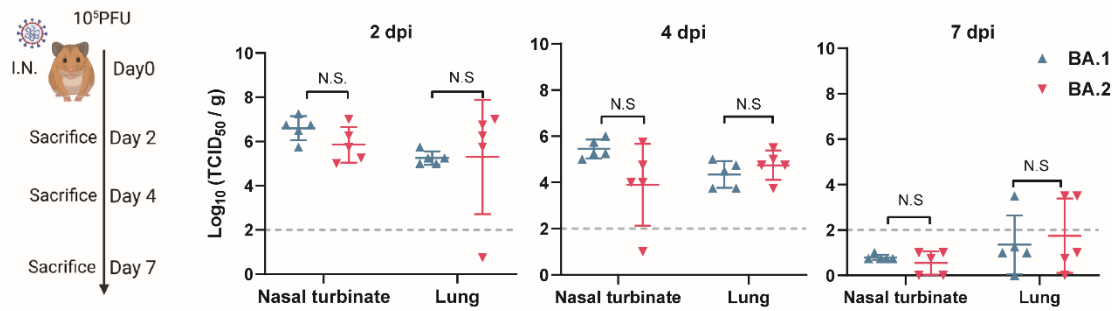

17

18 **Supplementary Figure 1. Replication kinetics of BA.1 and BA.2 in hamsters.** Nasal  
 19 turbinate and lung tissues were serially collected from the Omicron BA.1-infected and  
 20 Omicron BA.2-infected male Syrian hamsters (n = 5 per group) at the indicated time-  
 21 points for virus titration by TCID<sub>50</sub> assays. Data represent mean ± standard deviations.  
 22 N.S., not significantly different by Student's t-test.

23

24

25

26

27

28

29

30

31

32

33

34

35

36

37

38

39

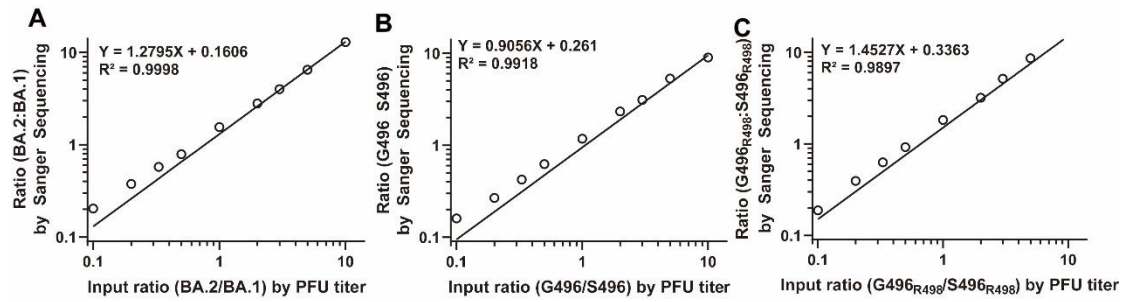

40

41 **Supplementary Figure 2. Validation of the competition assay.** The correlation  
 42 between input PFU ratios and output RT-PCR amplicon ratios determined by Sanger  
 43 sequencing. The BA.1 and BA.2 variants were mixed at PFU ratios of 10:1, 5:1, 3:1,  
 44 1:1, 1:3, 1:5, or 1:10. Total RNA of the mixture was extracted and amplified by RT-  
 45 PCR. Ratio was calculated by the peak heights of Sanger sequencing. **(A)** Ratios of  
 46 BA.2 to BA.1. **(B)** Ratios of G496 mutant virus to S496 virus. **(C)** Ratios of G496<sub>R498</sub>  
 47 single mutant virus to S496<sub>R498</sub> double mutant virus.

48

49

50

51

52

53

54

55

56

57

58

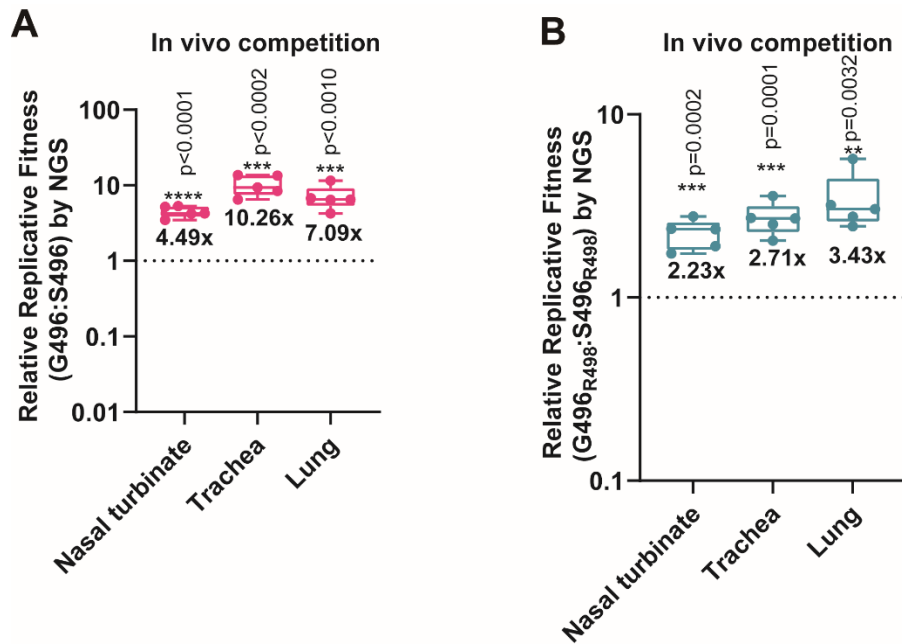

59

60 **Supplementary Figure 3. (A)** *In vivo* virus competition assay measuring the wildtype  
 61 (G496) to S496 viral-load ratios in the nasal turbinates, trachea, and lung of male  
 62 hamsters (n=5 hamsters) at 2 days post-infection (2dpi) by NGS. **(B)** *In vivo* virus  
 63 competition assay measuring the viral-load ratios of G496<sub>R498</sub> single mutant to the  
 64 S496<sub>R498</sub> double mutant were performed in male hamsters (n=5 hamsters) at 2dpi by  
 65 NGS. All data are indicated as mean ± SD. The ratios between the comparative variants  
 66 were calculated based on the ratio of reads containing the 2 spike mutations, G496S  
 67 and G498R. P values are calculated for the group (strain) coefficient for each linear  
 68 regression analysis of indicated sample ratios versus baseline ratio (1:1). \*\*P < 0.01;  
 69 \*\*\*P < 0.001; \*\*\*\*P < 0.0001.

70
